# Supplementary figures and images for: Investigation the mechanical proporties of weld experiments designed and fabricated according to ASME section IX for cryogenic -LNG application.
Source: Research Square preprint supplement (doi:10.21203/rs.3.rs-7992143/v1), 2025-11-04

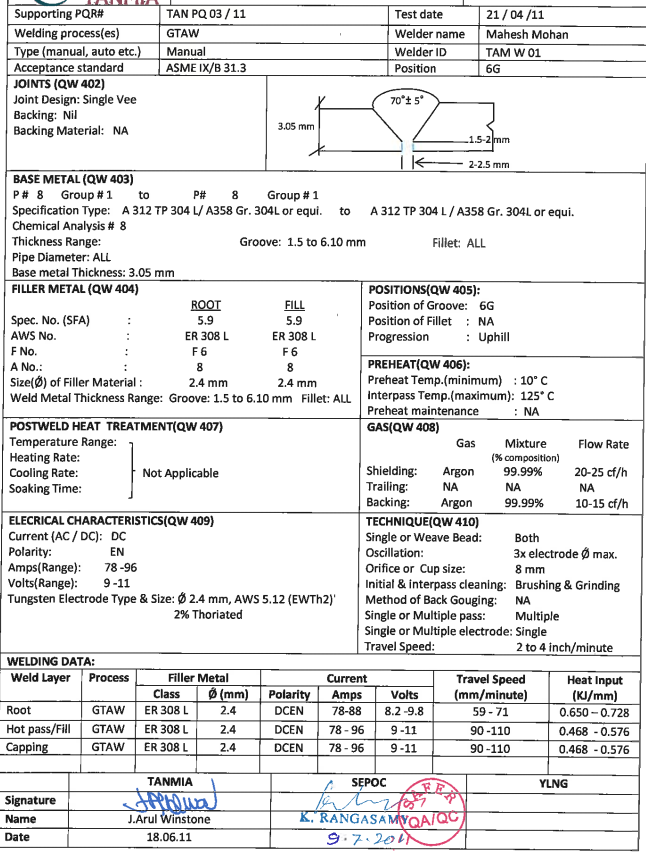


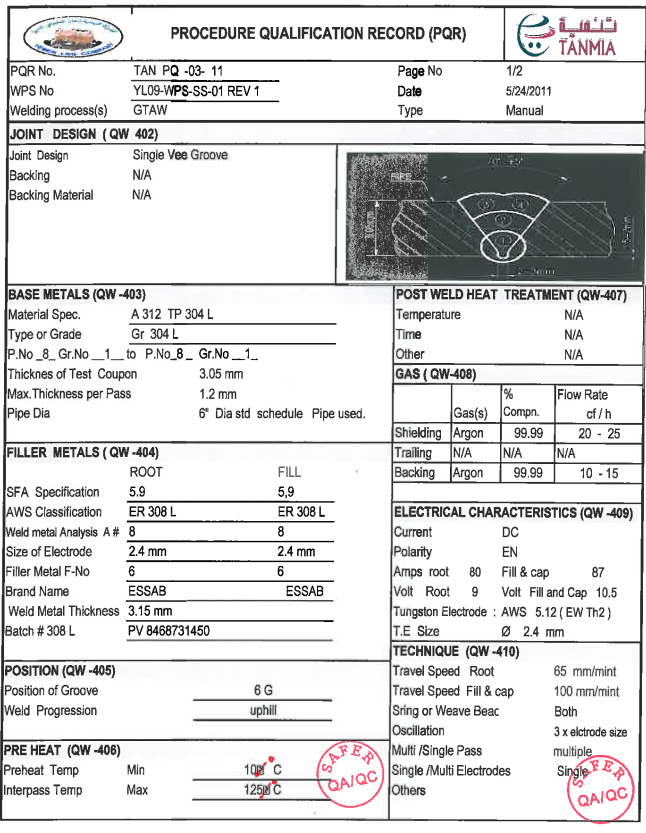


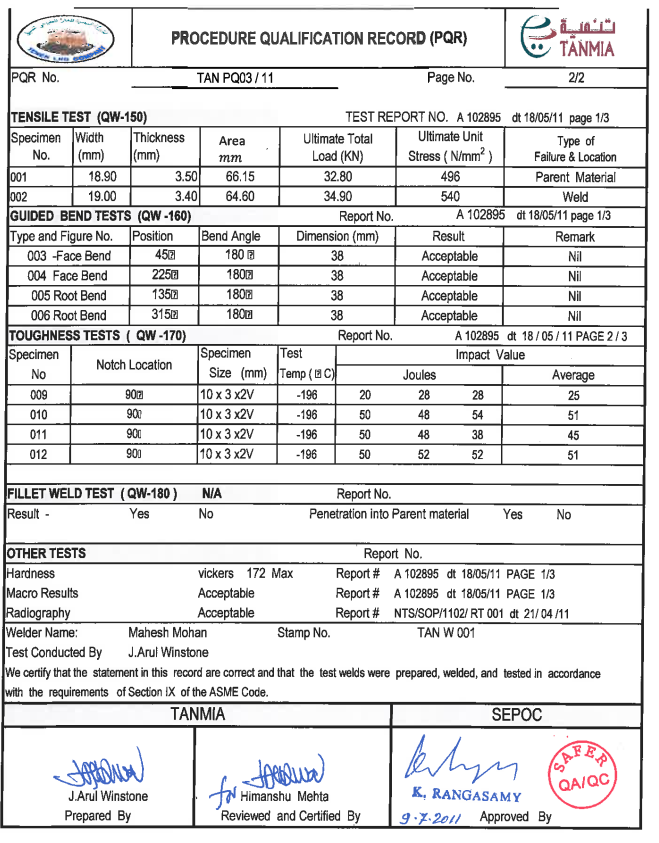


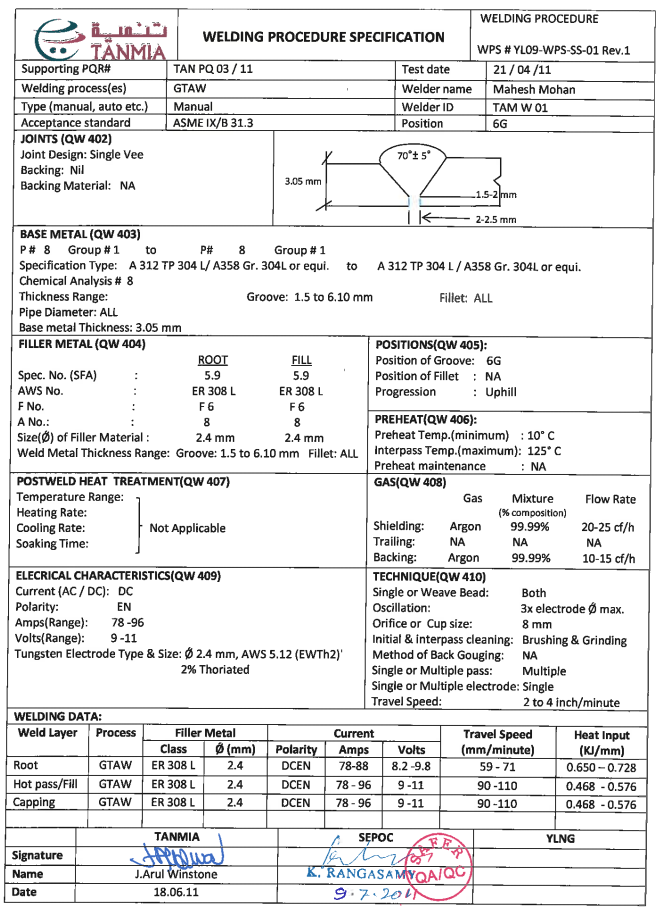


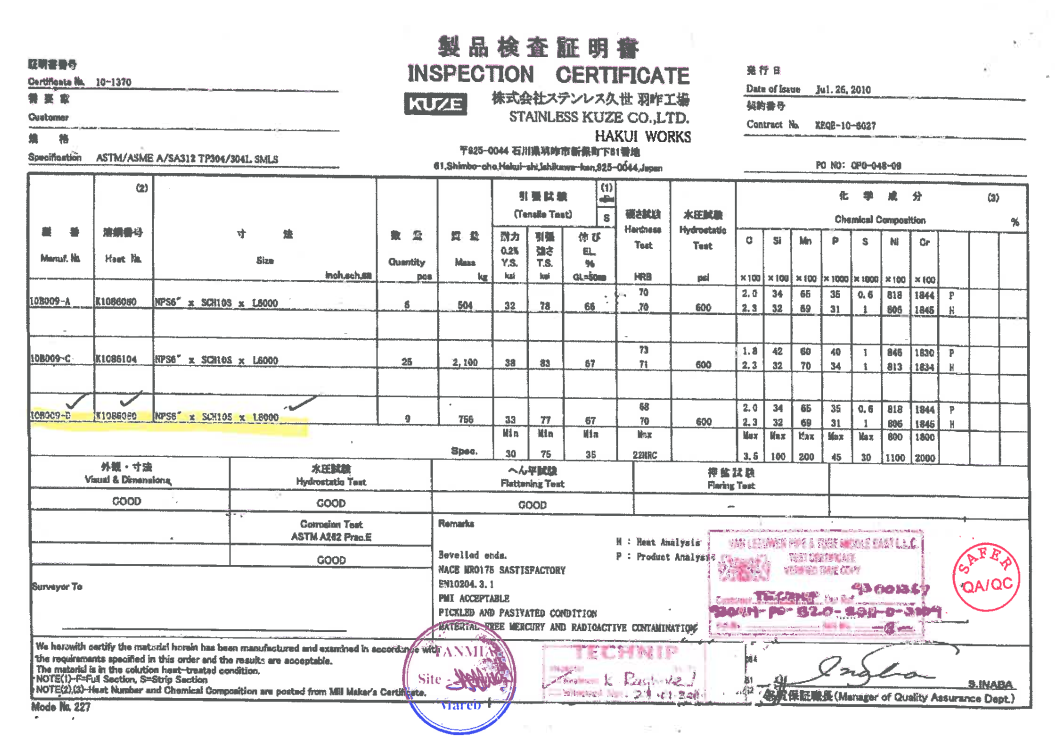


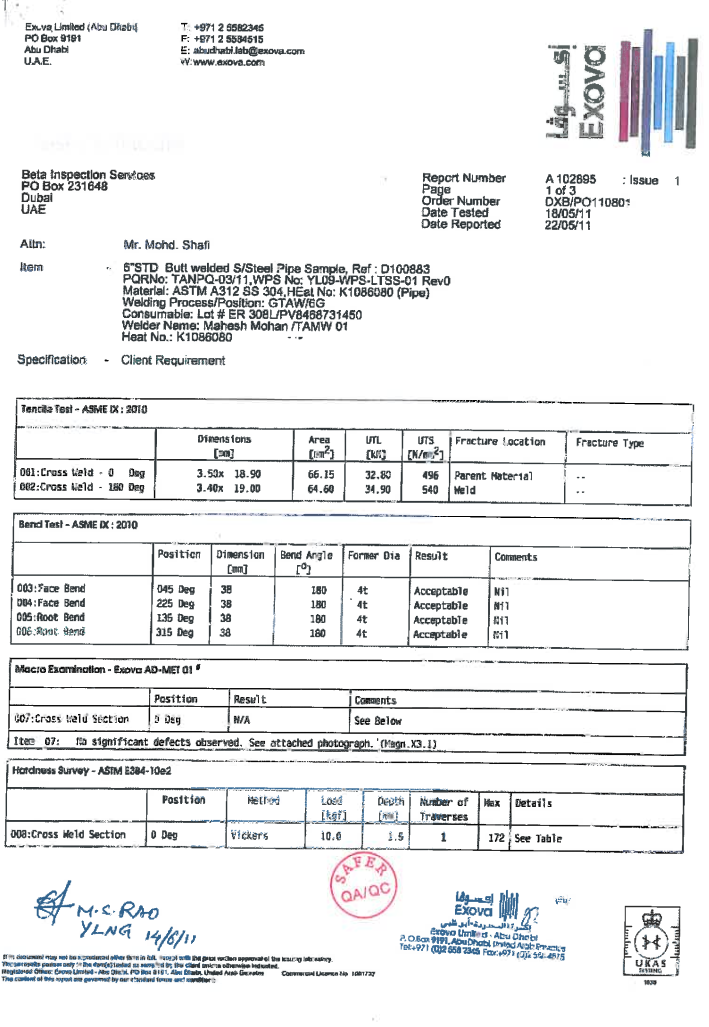


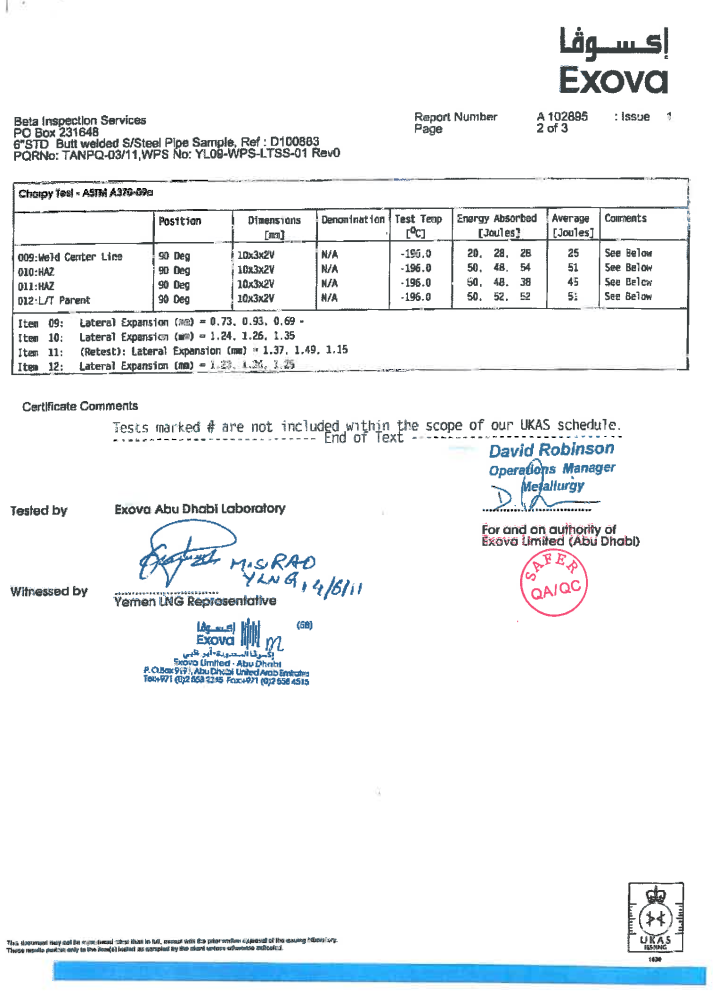


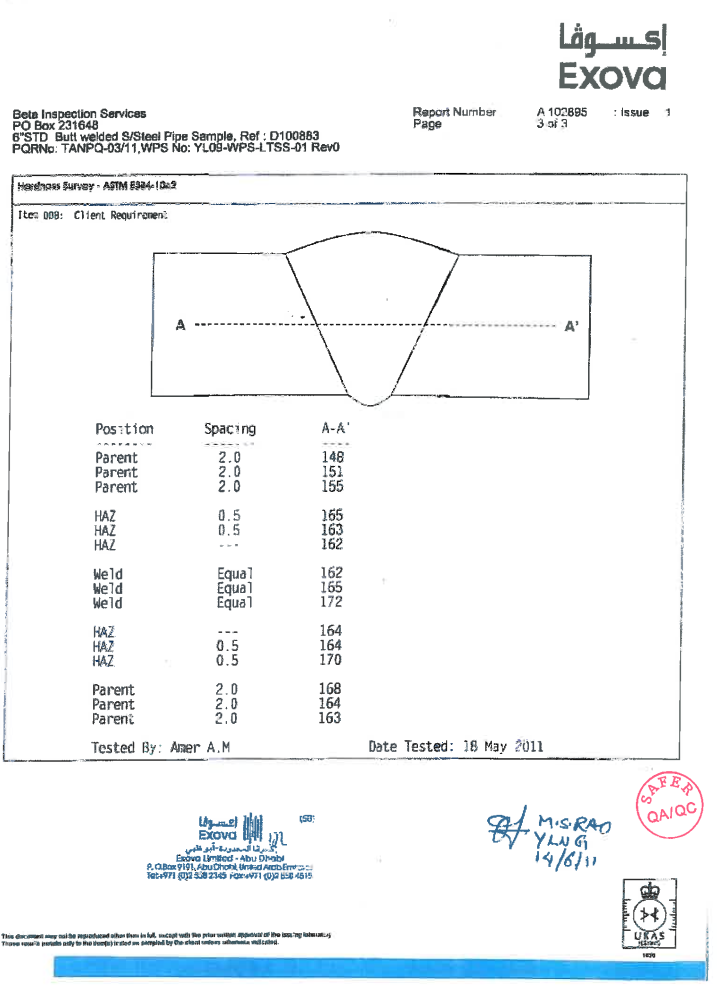


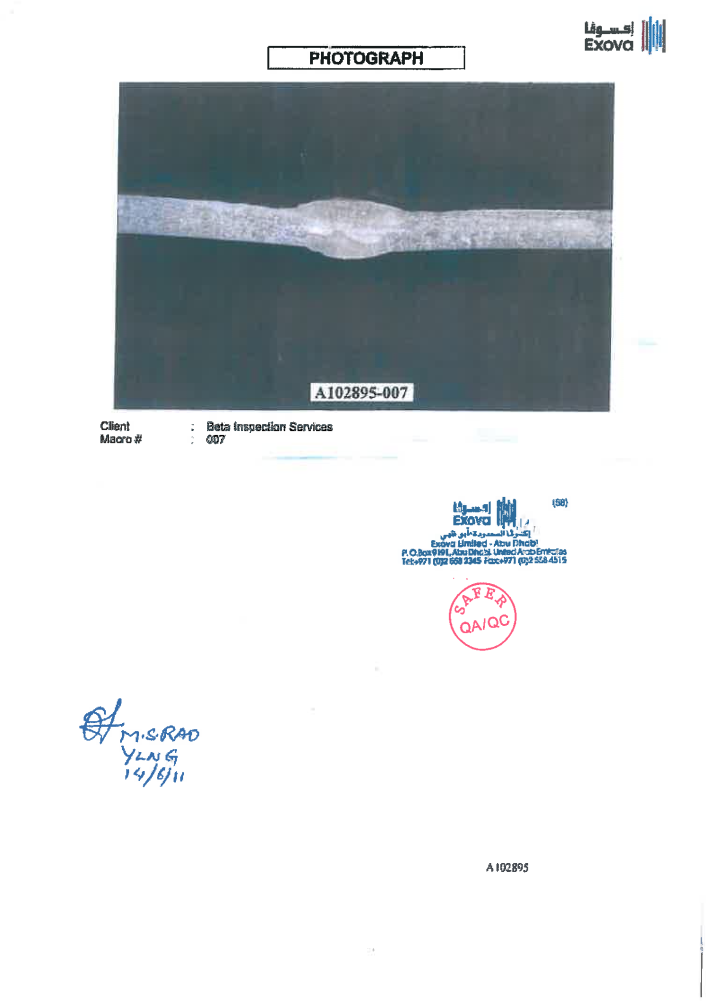


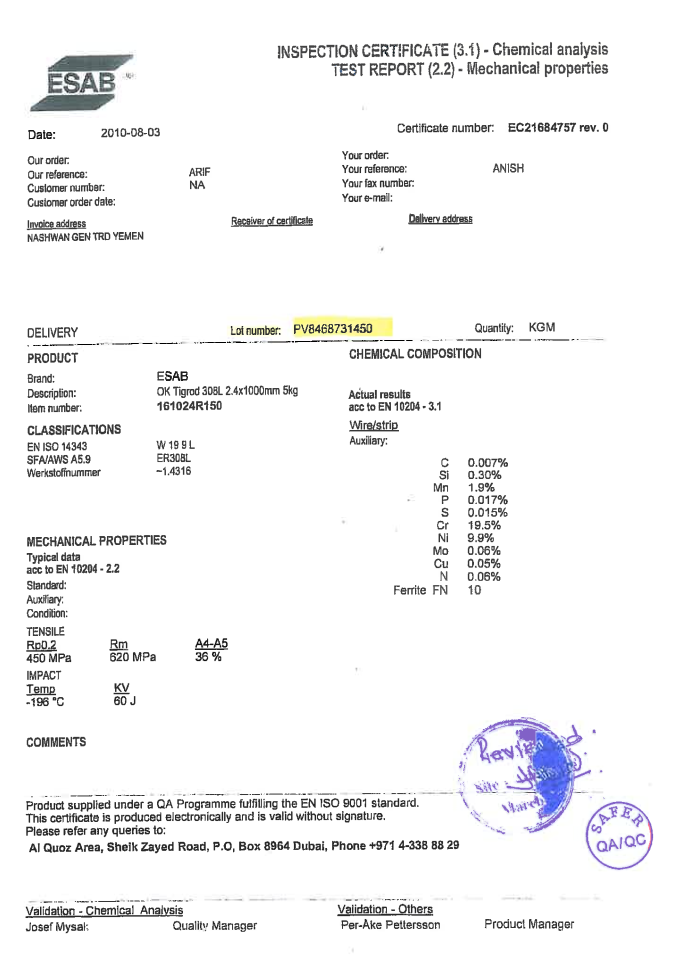

Supplement: Supplementary file 1 [file 63c19a2109924750618d4fe8.docx]
